# Supplementary material for: Poseidonibacter ostreae sp. nov., Isolated from the Gut of Ostrea from the Seomjin River
Source: MDPI journal article supplement (doi:10.3390/d15080920), 2023-08-09

Article

# ***Poseidonibacter ostreae* sp. nov., Isolated from the Gut of *Ostrea* from the Seomjin River**

**Kiwoon Baek, Sumin Jang, Eu Jin Chung, Shi Hyun Ryu and Ahyoung Choi \***

Nakdonggang National Institute of Biological Resources (NNIBR),  
Sangju 37242, Republic of Korea; backy8575@nnibr.re.kr (K.B.); als089@nnibr.re.kr (S.J.);  
eujenee@nnibr.re.kr (E.J.C.); bubo94@nnibr.re.kr (S.H.R.)

\* Correspondence: aychoi@nnibr.re.kr; Tel.: +82-54-530-0891; Fax: +82-54-530-0899

**Table S1.** Genome statistics of strains SJOD-M-6<sup>T</sup>, SJOD-M-5, and SJOD-M-33 and their related strains of species of genus *Poseidonibacter*.

Strains: 1, SJOD-M-6<sup>T</sup>; 2, SJOD-M-5; 3, SJOD-M-33; 4, *P. parvus* LPB0137<sup>T</sup>; 5, *P. antarcticus* SM1702<sup>T</sup>; 6, *P. lekithochrous* DSM 100870<sup>T</sup>.

Abbreviations: <sup>a</sup>, data obtained from this study; <sup>b</sup>, from GenBank.

| Features                          | 1 <sup>a</sup>   | 2 <sup>a</sup>   | 3 <sup>a</sup>   | 4 <sup>b</sup>     | 5 <sup>b</sup> | 6 <sup>b</sup>          |
|-----------------------------------|------------------|------------------|------------------|--------------------|----------------|-------------------------|
| <b>Sequencing platform</b>        | Illumina Novaseq | Illumina Novaseq | Illumina Novaseq | PacBio             | Illumina MiSeq | PacBio + Illumina MiSeq |
| <b>Assembler</b>                  | Unicycler        | Unicycler        | Unicycler        | SMRT Analysis v2.3 | ABYSS v.2.0.2  | Newbler v. 2.6          |
| <b>Estimated genome size (bp)</b> | 2,858,436        | 2,958,551        | 3,206,717        | 2,866,429          | 2,919,928      | 3,568,672               |
| <b>Number of contigs</b>          | 162              | 156              | 182              | 1                  | 57             | 1                       |
| <b>Coverage</b>                   | 1668.0 ×         | 1827.0 ×         | 1795.0 ×         | 421.0 ×            | 782.0 ×        | 410.0 ×                 |
| <b>Contig N<sub>50</sub></b>      | 55,001           | 49,062           | 47,531           | 2,866,429          | 260,053        | 343,594                 |
| <b>Number of rRNA genes</b>       | 3                | 3                | 3                | 19                 | 14             | 24                      |
| <b>Number of tRNA genes</b>       | 44               | 42               | 45               | 65                 | 46             | 82                      |
| <b>DNA G+C mol%</b>               | 27.5             | 27.5             | 27.6             | 27.7               | 27.1           | 28.2                    |
| <b>Accession number</b>           | WFKI000000000    | WFKJ000000000    | WFKK000000000    | CP019070           | RCWF000000000  | CP054052                |

**Figure S1.** Circular map of the *Poseidonibacter* sp. strain SJOD-M-6<sup>T</sup> genome. From outside to the center; the colored bands in ring 1 represent contigs; ring 2 represents the annotated genes on the forward strand (color determined by COG category); ring 3 shows the annotated genes on the reverse strand (color determined by COG category); ring 4 displays the RNA genes (rRNAs are displayed in red and tRNAs are displayed in purple); ring 5 shows the GC skew (higher-than-average values are displayed in green, while lower-than-average values are displayed in red) and ring 6 shows the GC ratio (higher-than-average values in blue and lower-than-average values in yellow).

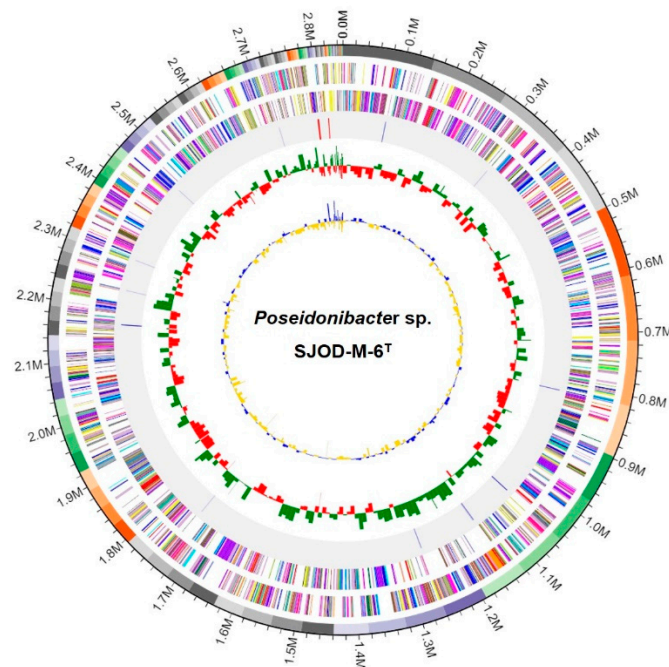

**Figure S2.** Subsystem category distribution of strain SJOD-M-6<sup>T</sup> based on the RAST annotation server (<https://rast.nmpdr.org/>) (accessed on 25 May 2023).

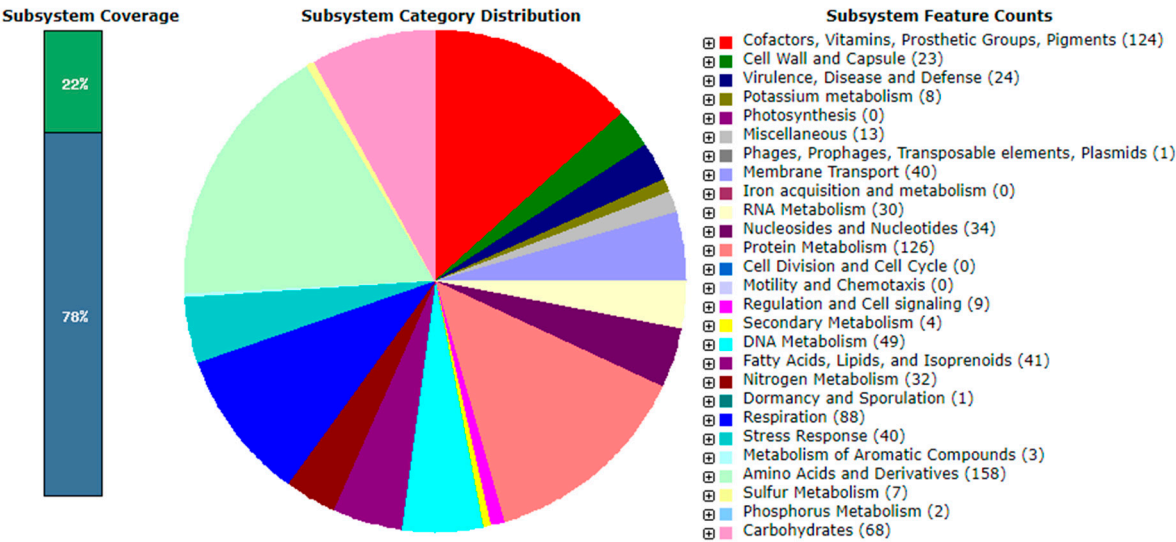

**Figure S3.** COG functional classification of proteins in strain SJOD-M-6<sup>T</sup> genome.

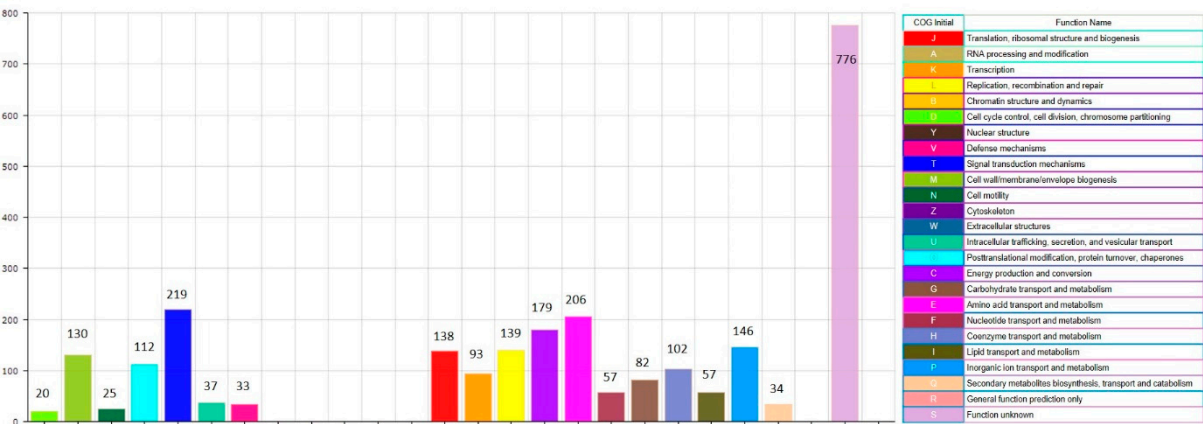

**Figure S4.** Venn diagram representing the core orthologous and unique genes for strains SJOD-M-6<sup>T</sup> and closely related type strains.

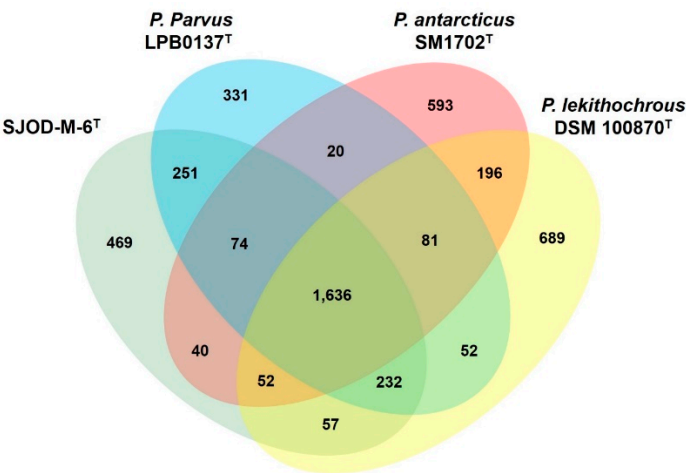

**Figure S5.** Phylogenomic tree based on concatenated multiple-alignment of 82 genes showing the relationship between SJOD-M-6<sup>T</sup> and members of the family *Arcobacteraceae*. The tree was generated using UBCG2 pipeline with the concatenation of 82 gene sequences. GenBank accession numbers are shown in parentheses. Percentage bootstrap values are 60 shown at the branch points. The tree was rooted with *Hydrogenimonas thermophila* EP 1551<sup>T</sup> (FOXB000000000). The Bar represents 0.05 substitutions per nucleotide position.

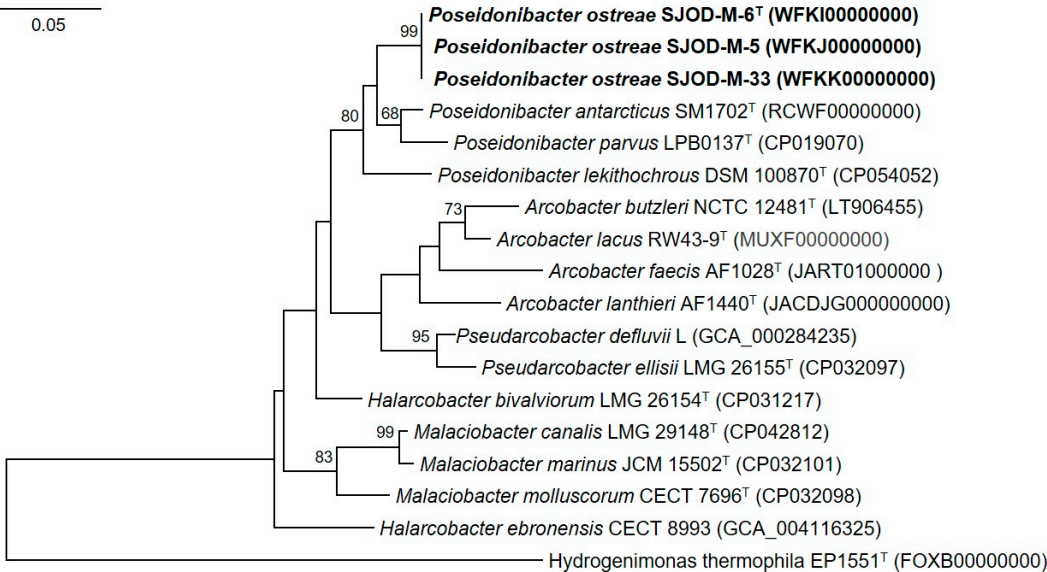

**Figure S6.** Transmission electron micrograph of negatively stained cells of strain SJOD-M-6<sup>T</sup>.  
Bar, 200 nm.

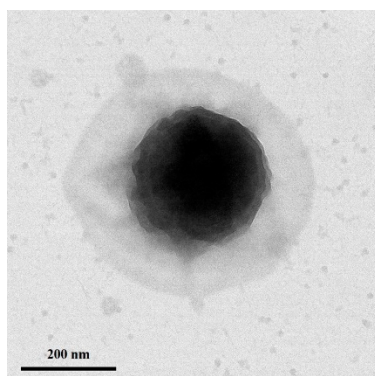

**Figure S7.** Two-dimensional thin-layer chromatogram showing polar lipids of SJOD-M-6<sup>T</sup>, which were stained with a phosphomolybdic acid solution for total lipids (A), spraying zinzadze reagent (molybdenum blue spray reagent, 1.3%) for phospholipids (B), and 0.2% ninhydrin solution for aminolipids (C),  $\alpha$ -naphthol solution for glycolipids (D), respectively. Abbreviations: PE, phosphatidylethanolamine; PG, phosphatidylglycerol; PL1–2, unidentified phospholipids; AL, unidentified aminolipid.; APL, unidentified aminophospholipid.

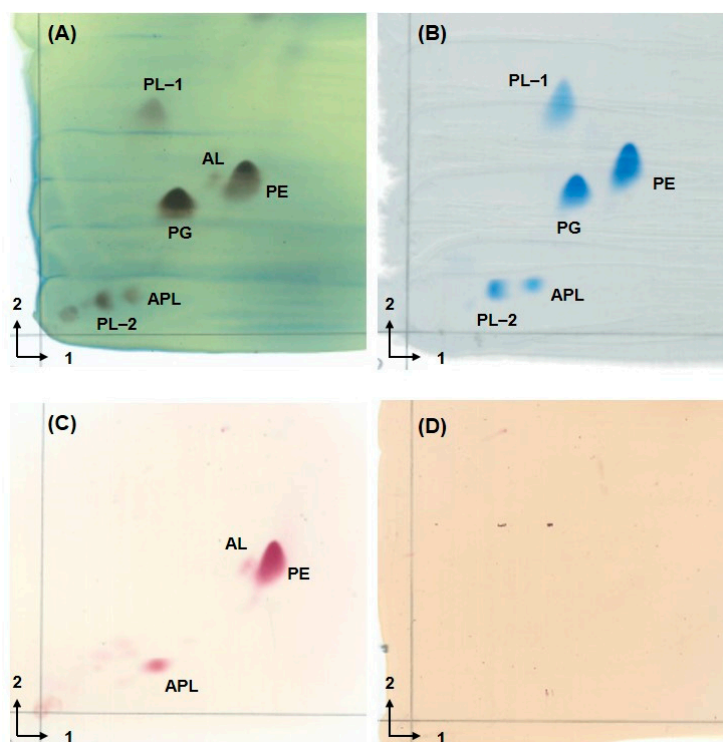

Supplement: s1 [file s1]
