# Supplementary material for: Poseidonibacter ostreae sp. nov., Isolated from the Gut of Ostrea from the Seomjin River
Source: MDPI journal article supplement (doi:10.3390/d15080920), 2023-08-09
Supplement: s1 [file s1]

Archive with 1 entries (1 files):
- diversity-2526041-supplementary.pdf
